# Supplementary material for: Methyl Jasmonate Treatment of Broccoli Enhanced Glucosinolate Concentration, Which Was Retained after Boiling, Steaming, or Microwaving
Source: PubMed Central journal article supplement (PMC7353551; doi:10.3390/foods9060758), 2020-06-08
Supplement: foods-09-00758-s001.pdf [file foods-09-00758-s001.pdf]

Table S1. Total glucosinolate profile ( $\mu\text{mole} \cdot \text{mL}$ ) in the cooking water collected from cooked broccoli with or without 250  $\mu\text{M}$  methyl jasmonate application (average  $\pm$  SD, n=3).

|             |       |         | Total glucosinolates in cooking water<br>( $\mu\text{mole} \cdot \text{mL}$ ) |
|-------------|-------|---------|-------------------------------------------------------------------------------|
| Boiling     | 2 min | Control | 0.10 $\pm$ 0.00                                                               |
|             |       | MeJA    | 0.22 $\pm$ 0.30 <sup>ns</sup>                                                 |
|             | 5 min | Control | 0.13 $\pm$ 0.01                                                               |
|             |       | MeJA    | 0.05 $\pm$ 0.00*                                                              |
| Steaming    | 2 min | Control | 0.01 $\pm$ 0.00                                                               |
|             |       | MeJA    | 0.01 $\pm$ 0.00 <sup>ns</sup>                                                 |
|             | 5 min | Control | 0.01 $\pm$ 0.01                                                               |
|             |       | MeJA    | 0.02 $\pm$ 0.00*                                                              |
| Microwaving | 2 min | Control | 0.03 $\pm$ 0.01                                                               |
|             |       | MeJA    | 0.01 $\pm$ 0.00 <sup>ns</sup>                                                 |
|             | 5 min | Control | 0.03 $\pm$ 0.01                                                               |
|             |       | MeJA    | 0.08 $\pm$ 0.02*                                                              |

Asterisk (\*) indicates significant difference with or without MeJA within the same cooking treatment by Student's T-test ( $P \leq 0.05$ , N=3). <sup>ns</sup>, not significant; \*,  $P \leq 0.05$ ; \*\*,  $P \leq 0.01$ ; \*\*\*,  $P \leq 0.001$ .

Table S2. Results of two-way ANOVA (MeJA treatment × cooking method) for glucosinolate profiles of 2-minute cooking (A) and of 5-minute cooking (B).

(A)

| Total Aliphatic GLS |                      |    |                |          |          |
|---------------------|----------------------|----|----------------|----------|----------|
| Source              | Number of parameters | DF | Sum of Squares | F Ratio  | Prob > F |
| MeJA treatment      | 1                    | 1  | 2.55258        | 2.0434   | 0.1721   |
| Cooking             | 3                    | 3  | 79.07297       | 21.1     | <.0001   |
| Cooking*MeJA        | 3                    | 3  | 9.954825       | 2.6564   | 0.0837   |
| Total indolyl GLS   |                      |    |                |          |          |
| Source              | Number of parameters | DF | Sum of Squares | F Ratio  | Prob > F |
| MeJA treatment      | 1                    | 1  | 3278.25        | 464.2703 | <.0001   |
| Cooking             | 3                    | 3  | 639.8043       | 30.2033  | <.0001   |
| Cooking*MeJA        | 3                    | 3  | 260.3897       | 12.2923  | 0.0002   |
| Total GLS           |                      |    |                |          |          |
| Source              | Number of parameters | DF | Sum of Squares | F Ratio  | Prob > F |
| MeJA treatment      | 1                    | 1  | 2790.209       | 319.1227 | <.0001   |
| Cooking             | 3                    | 3  | 984.7455       | 37.5425  | <.0001   |
| Cooking*MeJA        | 3                    | 3  | 353.2774       | 13.4684  | 0.0001   |

  

(B)

| Total Aliphatic GLS |       |    |                |          |          |
|---------------------|-------|----|----------------|----------|----------|
| Source              | Nparm | DF | Sum of Squares | F Ratio  | Prob > F |
| MeJA treatment      | 1     | 1  | 2.552580       | 28.3724  | 0.1721   |
| Cooking             | 3     | 3  | 79.072965      | 19.1566  | <.0001   |
| Cooking*MeJA        | 3     | 3  | 9.954825       | 5.718    | 0.0834   |
| Total indolyl GLS   |       |    |                |          |          |
| Source              | Nparm | DF | Sum of Squares | F Ratio  | Prob > F |
| MeJA treatment      | 1     | 1  | 3278.25        | 464.2703 | <.0001   |
| Cooking             | 3     | 3  | 639.8043       | 30.2033  | <.0001   |
| Cooking*MeJA        | 3     | 3  | 260.3897       | 12.2923  | 0.0002   |
| Total GLS           |       |    |                |          |          |
| Source              | Nparm | DF | Sum of Squares | F Ratio  | Prob > F |
| MeJA treatment      | 1     | 1  | 3262.142       | 280.3611 | <.0001   |
| Cooking             | 3     | 3  | 1153.127       | 33.0347  | <.0001   |
| Cooking*MeJA        | 3     | 3  | 320.7688       | 9.1894   | 0.0009   |

Table S3. Glucosinolate profile ( $\mu\text{mole} \cdot \text{g}^{-1}$  dry weight) of aliphatic glucosinolates (A) and indole and benzenic glucosinolates (B) in raw cooked broccoli with or without 250  $\mu\text{M}$  methyl jasmonate application (average  $\pm$  SD,  $n=3$ ). same cooking treatment.

(A)

|             |         |         | Glucoraphanin                 | Gluconapin                    | Progoitrin                    | Glucoerucin                   | Glucoiberin                   | Sinigrin                      | Total Aliphatic GSLs          |
|-------------|---------|---------|-------------------------------|-------------------------------|-------------------------------|-------------------------------|-------------------------------|-------------------------------|-------------------------------|
| Raw         | Control |         | 3.30 $\pm$ 0.29               | 0.09 $\pm$ 0.02               | 0.47 $\pm$ 0.05               | 0.06 $\pm$ 0.01               | 0.56 $\pm$ 0.05               | 0.15 $\pm$ 0.01               | 4.63 $\pm$ 0.39               |
|             | MeJA    |         | 2.33 $\pm$ 0.25*              | 0.06 $\pm$ 0.01*              | 0.56 $\pm$ 0.06*              | 0.08 $\pm$ 0.01*              | 0.43 $\pm$ 0.05*              | 0.14 $\pm$ 0.01 <sup>ns</sup> | 3.59 $\pm$ 0.38*              |
| Boiling     | 2 min   | Control | 1.75 $\pm$ 0.23               | 0.31 $\pm$ 0.03               | 0.29 $\pm$ 0.07               | 0.03 $\pm$ 0.00               | 0.45 $\pm$ 0.10               | 0.08 $\pm$ 0.02               | 2.92 $\pm$ 0.41               |
|             |         | MeJA    | 1.76 $\pm$ 0.18 <sup>ns</sup> | 0.34 $\pm$ 0.02 <sup>ns</sup> | 0.40 $\pm$ 0.04 <sup>ns</sup> | 0.03 $\pm$ 0.00*              | 0.48 $\pm$ 0.07 <sup>ns</sup> | 0.11 $\pm$ 0.01 <sup>ns</sup> | 3.13 $\pm$ 0.08 <sup>ns</sup> |
|             | 5 min   | Control | 1.41 $\pm$ 0.09               | 0.20 $\pm$ 0.06               | 0.20 $\pm$ 0.01               | 0.03 $\pm$ 0.00               | 0.33 $\pm$ 0.03               | 0.06 $\pm$ 0.01               | 2.23 $\pm$ 0.08               |
|             |         | MeJA    | 1.14 $\pm$ 0.19 <sup>ns</sup> | 0.17 $\pm$ 0.23 <sup>ns</sup> | 0.28 $\pm$ 0.05 <sup>ns</sup> | 0.01 $\pm$ 0.01*              | 0.23 $\pm$ 0.05 <sup>ns</sup> | 0.07 $\pm$ 0.01 <sup>ns</sup> | 1.90 $\pm$ 0.55 <sup>ns</sup> |
| Steaming    | 2 min   | Control | 2.64 $\pm$ 0.35               | 0.09 $\pm$ 0.01               | 0.44 $\pm$ 0.03               | 0.05 $\pm$ 0.01               | 0.46 $\pm$ 0.07               | 0.15 $\pm$ 0.01               | 3.83 $\pm$ 0.45               |
|             |         | MeJA    | 2.45 $\pm$ 0.11 <sup>ns</sup> | 0.07 $\pm$ 0.01 <sup>ns</sup> | 0.61 $\pm$ 0.02*              | 0.08 $\pm$ 0.01*              | 0.45 $\pm$ 0.02 <sup>ns</sup> | 0.15 $\pm$ 0.01 <sup>ns</sup> | 3.81 $\pm$ 0.14 <sup>ns</sup> |
|             | 5 min   | Control | 3.00 $\pm$ 0.02               | 0.08 $\pm$ 0.03               | 0.45 $\pm$ 0.04               | 0.06 $\pm$ 0.01               | 0.54 $\pm$ 0.00               | 0.15 $\pm$ 0.02               | 4.27 $\pm$ 0.12               |
|             |         | MeJA    | 2.47 $\pm$ 0.36 <sup>ns</sup> | 0.07 $\pm$ 0.01 <sup>ns</sup> | 0.61 $\pm$ 0.07*              | 0.08 $\pm$ 0.00*              | 0.48 $\pm$ 0.09 <sup>ns</sup> | 0.15 $\pm$ 0.03 <sup>ns</sup> | 3.86 $\pm$ 0.57 <sup>ns</sup> |
| Microwaving | 2 min   | Control | 2.63 $\pm$ 0.52               | 0.09 $\pm$ 0.02               | 0.36 $\pm$ 0.05               | 0.05 $\pm$ 0.01               | 0.45 $\pm$ 0.10               | 0.13 $\pm$ 0.03               | 3.72 $\pm$ 0.72               |
|             |         | MeJA    | 2.17 $\pm$ 0.21 <sup>ns</sup> | 0.06 $\pm$ 0.00 <sup>ns</sup> | 0.53 $\pm$ 0.06*              | 0.06 $\pm$ 0.01 <sup>ns</sup> | 0.40 $\pm$ 0.04 <sup>ns</sup> | 0.13 $\pm$ 0.02 <sup>ns</sup> | 3.34 $\pm$ 0.33 <sup>ns</sup> |
|             | 5 min   | Control | 2.75 $\pm$ 0.15               | 0.08 $\pm$ 0.00               | 0.40 $\pm$ 0.05               | 0.06 $\pm$ 0.01               | 0.51 $\pm$ 0.04               | 0.14 $\pm$ 0.01               | 3.94 $\pm$ 0.24               |
|             |         | MeJA    | 2.54 $\pm$ 0.13 <sup>ns</sup> | 0.08 $\pm$ 0.02 <sup>ns</sup> | 0.68 $\pm$ 0.08*              | 0.08 $\pm$ 0.01*              | 0.49 $\pm$ 0.05 <sup>ns</sup> | 0.17 $\pm$ 0.02 <sup>ns</sup> | 4.03 $\pm$ 0.29 <sup>ns</sup> |

Asterisk (\*) indicates significant difference with or without MeJA within the same cooking treatment by Student's T-test ( $P \leq 0.05$ ,  $N=3$ ) with the significant interaction between MeJA treatment and cooking treatment detected (Supplementary Table S2). <sup>ns</sup>, not significant; \*,  $P \leq 0.05$

(B)

|             |         |         | Glucobrassicin | Neoglucobrassicin | 4-methoxy-glucobrassicin | Total indole GSLs | Gluconasturtiin         | Total GSLs  |
|-------------|---------|---------|----------------|-------------------|--------------------------|-------------------|-------------------------|-------------|
| Raw         | Control |         | 1.52±0.09      | 2.50±0.24         | 0.25±0.02                | 4.26±0.32         | 0.05±0.01               | 8.93±0.63   |
|             | MeJA    |         | 2.31±0.31*     | 14.68±1.97*       | 0.30±0.03*               | 14.21±6.15*       | 0.05±0.01 <sup>ns</sup> | 20.92±2.62* |
| Boiling     | 2 min   | Control | 0.90±0.02      | 1.10±0.04         | 0.15±0.00                | 2.19±0.07         | 0.04±0.01               | 5.16±0.35   |
|             |         | MeJA    | 1.79±0.06*     | 7.07±0.16*        | 0.20±0.01*               | 9.10±0.23*        | 0.07±0.04 <sup>ns</sup> | 12.30±0.18* |
|             | 5 min   | Control | 0.66±0.04      | 0.81±0.11         | 0.11±0.01                | 1.61±0.16         | 0.04±0.01               | 3.88±0.17   |
|             |         | MeJA    | 1.48±0.06*     | 6.27±1.45*        | 0.15±0.01*               | 7.93±1.45*        | 0.03±0.01 <sup>ns</sup> | 9.86±0.93*  |
| Steaming    | 2 min   | Control | 1.59±0.07      | 2.34±0.22         | 0.25±0.00                | 4.19±0.30         | 0.05±0.00               | 8.06±0.21   |
|             |         | MeJA    | 2.34±0.08*     | 14.83±1.35*       | 0.32±0.01*               | 17.50±1.44*       | 0.16±0.05*              | 21.47±1.51* |
|             | 5 min   | Control | 1.44±0.06      | 2.02±0.21         | 0.23±0.01                | 3.09±1.12         | 0.05±0.01               | 8.03±0.27   |
|             |         | MeJA    | 2.49±0.14*     | 15.53±1.40*       | 0.30±0.01*               | 18.33±1.46*       | 0.09±0.01*              | 22.29±1.73* |
| Microwaving | 2 min   | Control | 1.37±0.24      | 2.02±0.35         | 0.24±0.04                | 3.62±0.61         | 0.03±0.00               | 7.38±1.29   |
|             |         | MeJA    | 2.33±0.17*     | 14.10±1.73*       | 0.30±0.03 <sup>ns</sup>  | 16.73±1.83*       | 0.04±0.01 <sup>ns</sup> | 20.12±2.14* |
|             | 5 min   | Control | 1.44±0.08      | 2.16±0.29         | 0.23±0.02                | 3.82±0.37         | 0.04±0.01               | 7.81±0.51   |
|             |         | MeJA    | 2.33±0.08*     | 15.08±1.67*       | 0.31±0.03*               | 17.73±1.73*       | 0.08±0.03 <sup>ns</sup> | 21.85±1.83* |

Asterisk (\*) indicates significant difference with or without MeJA within the same cooking treatment by Student's T-test ( $P \leq 0.05$ ,  $N=3$ ) with the significant interaction between MeJA treatment and cooking treatment detected (Supplementary Table S2). <sup>ns</sup>, not significant; \*,  $P \leq 0.05$

Table S4. Two-way analysis of variance (ANOVA) of the electrical conductivity in cooking water of broccoli with or without 250  $\mu$ M MeJA treatment.

| <b>2- min cooking</b> |              |           |                       |                |                    |  |
|-----------------------|--------------|-----------|-----------------------|----------------|--------------------|--|
| <b>Source</b>         | <b>Nparm</b> | <b>DF</b> | <b>Sum of Squares</b> | <b>F Ratio</b> | <b>Prob &gt; F</b> |  |
| <b>MeJA treatment</b> | 1            | 1         | 254.4                 | 0.5095         | 0.489              |  |
| <b>Cooking</b>        | 2            | 2         | 2709778.6             | 2713.816       | <.0001             |  |
| <b>Cooking*MeJA</b>   | 2            | 2         | 768.7                 | 0.7698         | 0.4847             |  |
| <b>5-min cooking</b>  |              |           |                       |                |                    |  |
| <b>Source</b>         | <b>Nparm</b> | <b>DF</b> | <b>Sum of Squares</b> | <b>F Ratio</b> | <b>Prob &gt; F</b> |  |
| <b>MeJA treatment</b> | 1            | 1         | 12675.9               | 10.7719        | 0.0066             |  |
| <b>Cooking</b>        | 2            | 2         | 4322252               | 1836.512       | <.0001             |  |
| <b>Cooking*MeJA</b>   | 2            | 2         | 6115.6                | 2.5985         | 0.1154             |  |

Table S5. The peak intensity ( $\times 10^3$ ) of glucosinolate hydrolysis products in (A) raw and 2-minute cooked and (B) raw and 5-minute cooked “Green Magic” broccoli with or without 250  $\mu$ M methyl jasmonate application (average  $\pm$  SD, n=3). Compound identification were based on a previous publication (Kim et al., 2017) or by comparison with data in the National Institute of Standards and Technology (NIST) library.

(A)

|                                     | Raw                |                               | 2-minute Boiling |                                 | 2-minute Steaming  |                                 | 2-minute Microwaving |                               |
|-------------------------------------|--------------------|-------------------------------|------------------|---------------------------------|--------------------|---------------------------------|----------------------|-------------------------------|
|                                     | Control            | MeJA                          | Control          | MeJA                            | Control            | MeJA                            | Control              | MeJA                          |
| Sulforaphane                        | 0.10 $\pm$ 0.02    | 0.39 $\pm$ 0.19 <sup>ns</sup> | 0.08 $\pm$ 0.07  | 0.27 $\pm$ 0.13 <sup>ns</sup>   | 0.12 $\pm$ 0.12    | 0.20 $\pm$ 0.17 <sup>ns</sup>   | 0.10 $\pm$ 0.09      | 0.11 $\pm$ 0.07 <sup>ns</sup> |
| Sulforaphane nitrile                | 4.37 $\pm$ 1.03    | 4.58 $\pm$ 1.48 <sup>ns</sup> | 5.47 $\pm$ 0.39  | 3.51 $\pm$ 0.95 <sup>ns</sup>   | 26.02 $\pm$ 30.61  | 3.84 $\pm$ 0.73*                | 8.60 $\pm$ 6.99      | 2.36 $\pm$ 1.78 <sup>ns</sup> |
| Erucin nitrile                      | 1.25 $\pm$ 0.75    | 0.67 $\pm$ 0.81 <sup>ns</sup> | 0.28 $\pm$ 0.34  | 1.83 $\pm$ 2.66 <sup>ns</sup>   | 0.38 $\pm$ 0.33    | 0.31 $\pm$ 0.19 <sup>ns</sup>   | 0.17 $\pm$ 0.18      | 3.13 $\pm$ 1.17**             |
| 1-cyano-3,4-epithiobutene           | 0.78 $\pm$ 0.43    | 0.37 $\pm$ 0.09 <sup>ns</sup> | 0.39 $\pm$ 0.26  | 0.60 $\pm$ 0.20 <sup>ns</sup>   | 0.73 $\pm$ 0.77    | 0.29 $\pm$ 0.05 <sup>ns</sup>   | 0.91 $\pm$ 0.70      | 0.33 $\pm$ 0.14 <sup>ns</sup> |
| 1-Cyano-2-hydroxy-3,4-epithiobutane | 0.82 $\pm$ 0.42    | 2.16 $\pm$ 0.55**             | 1.46 $\pm$ 1.24  | 0.67 $\pm$ 0.25 <sup>ns</sup>   | 0.98 $\pm$ 0.83    | 0.72 $\pm$ 0.12 <sup>ns</sup>   | 0.59 $\pm$ 0.10      | 0.55 $\pm$ 0.31 <sup>ns</sup> |
| NMI3CA                              | 35.00 $\pm$ 11.30  | 116.13 $\pm$ 38.96**          | 5.89 $\pm$ 0.76  | 13.70 $\pm$ 3.36 <sup>ns</sup>  | 22.75 $\pm$ 5.79   | 35.26 $\pm$ 8.82 <sup>ns</sup>  | 2.86 $\pm$ 0.83      | 7.25 $\pm$ 0.38 <sup>ns</sup> |
| NMI3CAN                             | 0.34 $\pm$ 0.33    | 0.65 $\pm$ 0.17***            | 0.29 $\pm$ 0.22  | 0.69 $\pm$ 0.30 <sup>ns</sup>   | 0.49 $\pm$ 0.14    | 0.44 $\pm$ 0.12 <sup>ns</sup>   | 0.49 $\pm$ 0.10      | 0.15 $\pm$ 0.18**             |
| NMI3C                               | 450.48 $\pm$ 39.56 | 3991.30 $\pm$ 539.36***       | 65.76 $\pm$ 8.96 | 53.09 $\pm$ 47.95 <sup>ns</sup> | 106.48 $\pm$ 95.03 | 4.13 $\pm$ 5.58 <sup>ns</sup>   | 33.30 $\pm$ 31.54    | 523.48 $\pm$ 67.09**          |
| Indole-3-acetonitrile               | 0.21 $\pm$ 0.14    | 0.26 $\pm$ 0.36 <sup>ns</sup> | 0.25 $\pm$ 0.24  | 0.48 $\pm$ 0.05 <sup>ns</sup>   | 0.78 $\pm$ 0.35    | 1.89 $\pm$ 1.11**               | 0.31 $\pm$ 0.03      | 0.44 $\pm$ 0.16 <sup>ns</sup> |
| Indole-3-carbinol                   | 0.23 $\pm$ 0.12    | 0.93 $\pm$ 0.13***            | 0.33 $\pm$ 0.15  | 0.67 $\pm$ 0.20*                | 0.34 $\pm$ 0.22    | 0.45 $\pm$ 0.19 <sup>ns</sup>   | 0.21 $\pm$ 0.17      | 0.22 $\pm$ 0.11 <sup>ns</sup> |
| Phenylethyl ITC                     | 0.44 $\pm$ 0.23    | 1.23 $\pm$ 0.26               | 3.80 $\pm$ 0.18  | 1.80 $\pm$ 0.40 <sup>ns</sup>   | 2.13 $\pm$ 2.74    | 3.43 $\pm$ 1.31 <sup>ns</sup>   | 1.97 $\pm$ 1.22      | 1.83 $\pm$ 1.51 <sup>ns</sup> |
| Total Peak Intensity                | 494.85 $\pm$ 50.28 | 4120.84 $\pm$ 579.74***       | 83.72 $\pm$ 8.20 | 77.72 $\pm$ 47.80 <sup>ns</sup> | 163.12 $\pm$ 83.80 | 51.59 $\pm$ 12.22 <sup>ns</sup> | 49.66 $\pm$ 36.61    | 540.69 $\pm$ 70.06***         |

(B)

|                                     | Raw          |                         | 5-minute Boiling |                             | 5-minute Steaming |                            | 5-minute Microwaving |                         |
|-------------------------------------|--------------|-------------------------|------------------|-----------------------------|-------------------|----------------------------|----------------------|-------------------------|
|                                     | Control      | MeJA                    | Control          | MeJA                        | Control           | MeJA                       | Control              | MeJA                    |
| Sulforaphane                        | 0.10±0.02    | 0.39±0.19               | 0.05±0.07        | 0.12±0.10**                 | 0.14±0.08         | 0.23±0.15                  | 0.17±0.06            | 0.20±0.05               |
| Sulforaphane nitrile                | 4.37±1.03    | 4.58±1.48 <sup>ns</sup> | 3.64±0.39        | 9.31±3.78**                 | 4.40±2.10         | 3.45±0.98 <sup>ns</sup>    | 8.00±6.96            | 4.76±1.48 <sup>ns</sup> |
| Erucin nitrile                      | 1.25±0.75    | 0.67±0.81 <sup>ns</sup> | 0.83±0.34        | 0.86±0.97 <sup>ns</sup>     | 0.58±0.25         | 0.50±0.25 <sup>ns</sup>    | 0.45±0.27            | 0.31±0.14 <sup>ns</sup> |
| 1-cyano-3,4-epithiobutene           | 0.78±0.43    | 0.37±0.09 <sup>ns</sup> | 0.34±0.26        | 0.63±0.20 <sup>ns</sup>     | 0.34±0.18         | 0.08±0.06 <sup>ns</sup>    | 0.31±0.23            | 0.23±0.24 <sup>ns</sup> |
| 1-Cyano-2-hydroxy-3,4-epithiobutane | 0.82±0.42    | 2.16±0.55***            | 1.15±0.26        | 0.65±0.20 <sup>ns</sup>     | 0.38±0.18         | 0.70±0.06 <sup>ns</sup>    | 0.34±0.23            | 0.75±0.24 <sup>ns</sup> |
| NMI3CA <sup>†</sup>                 | 35.00±11.30  | 116.13±38.96*           | 3.82±0.76        | 15.69±4.73 <sup>ns</sup>    | 56.13±25.34       | 78.29±41.51*               | 28.35±10.68          | 101.45±46.64**          |
| NMI3ACN <sup>‡</sup>                | 0.34±0.33    | 0.65±0.17***            | 0.54±0.22        | 0.25±0.42 <sup>ns</sup>     | 0.60±0.58         | 0.77±1.23 <sup>ns</sup>    | 0.55±0.45            | 0.46±0.42**             |
| NMI3C <sup>§</sup>                  | 450.48±39.56 | 3991.30±539.36***       | 599.27±8.96      | 812.66±371.75 <sup>ns</sup> | 135.23±231.83     | 182.61±55.04**             | 180.02±114.76        | 2361.27±1006.49**       |
| Indole-3-acetonitrile               | 0.21±0.14    | 0.26±0.36 <sup>ns</sup> | 0.37±0.24        | 0.23±0.30 <sup>ns</sup>     | 0.61±0.45         | 3.66±5.01 <sup>ns</sup>    | 0.23±0.23            | 0.51±0.20 <sup>ns</sup> |
| Indole-3-carbinol                   | 0.23±0.12    | 0.93±0.13***            | 0.36±0.15        | 0.33±0.09 <sup>ns</sup>     | 0.39±0.23         | 0.25±0.11 <sup>ns</sup>    | 0.31±0.13            | 0.72±0.41*              |
| Phenylethyl ITC                     | 0.44±0.23    | 1.23±0.26 <sup>ns</sup> | 3.19±0.18        | 1.24±0.48 <sup>ns</sup>     | 4.08±2.36         | 3.37±1.75*                 | 3.04±2.85            | 2.06±0.92 <sup>ns</sup> |
| Total Peak Intensity                | 494.43±50.06 | 4119.09±579.83***       | 614.72±8.20      | 842.64±371.75 <sup>ns</sup> | 204.44±234.45     | 274.67±78.81 <sup>ns</sup> | 222.11±100.33        | 2473.47±1054.43*        |

<sup>†</sup>NMI3CA= *N*-methoxyindole-3- carboxyaldehyde; <sup>‡</sup>NMI3CN= *N*-methoxyindole-3-acetonitrile; <sup>§</sup>NMI3C= *N*-methoxyindole-3-carbinol. Asterisk (\*) indicates significant difference with or without MeJA within the same cooking treatment by Student's T-test ( $P \leq 0.05$ ,  $N=3$ ). <sup>ns</sup>, not significant; \*,  $P \leq 0.05$ ; \*\*,  $P \leq 0.01$ ; \*\*\*,  $P \leq 0.001$ .

Table S6. Primary metabolites that high in variable influence on projection (VIP) by partial least square – discrimination analysis (PLS-DA) from raw and cooked ‘Green Magic’ broccoli with or without 250  $\mu$ M MeJA treatment by GC-MS analysis. All listed metabolites were significant changed by ANOVA at  $P \leq 0.05$ .

| Tentative metabolites | Retention time (min) | Characteristic ion ( <i>m/z</i> ) | TMS <sup>‡</sup>         | VIP  | Identification            |
|-----------------------|----------------------|-----------------------------------|--------------------------|------|---------------------------|
| Oxoproline            | 9.57                 | 73,147, <b>156</b> <sup>†</sup>   | (TMS) <sub>2</sub>       | 5.94 | NIST                      |
| Glutamic acid         | 10.36                | 73,128, <b>246</b>                | (TMS) <sub>3</sub>       | 1.89 | STD/NIST <sup>w</sup>     |
| Valine                | 6.75                 | 73, <b>144</b> ,218               | (TMS) <sub>2</sub>       | 1.69 | STD/NIST                  |
| Proline               | 7.58                 | 73, <b>142</b> ,216               | (TMS) <sub>2</sub>       | 2.85 | STD/NIST                  |
| Serine                | 7.17                 | 73, <b>116</b> ,132               | (TMS) <sub>2</sub>       | 1.97 | STD/NIST                  |
| Isoleucine            | 7.52                 | 73, <b>158</b> ,218               | (TMS) <sub>2</sub>       | 2.09 | STD/NIST                  |
| Alanine               | 5.60                 | 73, <b>116</b> , 147              | (TMS) <sub>2</sub>       | 2.70 | (Chiu, Juvik, & Ku, 2018) |
| Fructose              | 12.3                 | 73, <b>103</b> , 147, 217, 307    | Meox, (TMS) <sub>5</sub> | 1.93 | (Chiu, Juvik, & Ku, 2018) |
| Glucose <sup>y</sup>  | 12.42                | <b>73</b> , 147, 160, 205, 319    | Meox, (TMS) <sub>5</sub> | 8.11 | (Chiu, Juvik, & Ku, 2018) |
| Sucrose               | 16.80                | 73, 147, 217, 271, <b>361</b>     | (TMS) <sub>8</sub>       | 1.63 | (Chiu, Juvik, & Ku, 2018) |
| <i>Myo</i> -Inositol  | 13.73                | 73, <b>147</b> , 217, 305, 318    | (TMS) <sub>6</sub>       | 1.98 | STD/NIST                  |
| Quinic acid           | 12.15                | 147,255, <b>345</b>               | (TMS) <sub>5</sub>       | 1.66 | NIST                      |

<sup>†</sup> Highest peak is label as bold

<sup>‡</sup> Meox, methyloxime; TMS, trimethylsilyl.

<sup>§</sup> Metabolites were identified using commercial standard compounds (STD) in comparison with the mass spectra in The National Institute of Standards and Technology (NIST) and retention time.
